# Supplementary material for: A miRNA-based diagnostic model predicts resectable lung cancer in humans with high accuracy
Source: PubMed Central journal article supplement (PMC7081195; doi:10.1038/s42003-020-0863-y), 2020-03-19
Supplement: 42003_2020_863_MOESM1_ESM.pdf [file 42003_2020_863_MOESM1_ESM.pdf]

**Supplementary Table 1. Top 20 miRNAs in the discovery set**

| microRNAs   | AUC    | Cross-validation score |
|-------------|--------|------------------------|
| miR-17-3p   | 0.9346 | 0.9087                 |
| miR-6877-5p | 0.9491 | 0.8822                 |
| miR-1343-3p | 0.969  | 0.899                  |
| miR-187-5p  | 0.9126 | 0.8702                 |
| miR-1268b   | 0.9374 | 0.8678                 |
| miR-4787-3p | 0.9352 | 0.8606                 |
| miR-6765-5p | 0.9254 | 0.8534                 |
| miR-1199-5p | 0.9206 | 0.8726                 |
| miR-6075    | 0.8913 | 0.8269                 |
| miR-4258    | 0.8983 | 0.8317                 |
| miR-668-5p  | 0.8934 | 0.8365                 |
| miR-8073    | 0.9058 | 0.8341                 |
| miR-6511b   | 0.8943 | 0.8269                 |
| miR-320b    | 0.8868 | 0.8221                 |
| miR-4417    | 0.8815 | 0.8173                 |
| miR-6789-5p | 0.8925 | 0.8245                 |
| miR-8060    | 0.8779 | 0.8173                 |
| miR-1228-5p | 0.9175 | 0.8486                 |
| miR-4740-5p | 0.8884 | 0.8173                 |
| miR-29b-3p  | 0.8607 | 0.8149                 |

**Supplementary Table2. Top 20 microRNA combinations in model2  
(discovery set)**

| microRNAs                 | AUC    | Cross-validation score |
|---------------------------|--------|------------------------|
| miR-1268b + miR-6075      | 0.9934 | 0.9904                 |
| miR-6765-5p + miR-6836-3p | 0.9932 | 0.9736                 |
| miR-6765-5p + miR-4634    | 0.992  | 0.9736                 |
| miR-187-5p + miR-6765-5p  | 0.9942 | 0.976                  |
| miR-1343-3p + miR-4632-5p | 0.993  | 0.9736                 |
| miR-1343-3p + miR-4728-5p | 0.9947 | 0.9736                 |
| miR-1343-3p + miR-197-5p  | 0.9942 | 0.9736                 |
| miR-1343-3p + miR-6887-5p | 0.9912 | 0.9736                 |
| miR-1343-3p + miR-4419b   | 0.9946 | 0.9808                 |
| miR-1268b + miR-7108-5p   | 0.9875 | 0.9688                 |
| miR-1343-3p + miR-3619-3p | 0.9923 | 0.9639                 |
| miR-1268b + miR-4467      | 0.9813 | 0.9688                 |
| miR-1343-3p + miR-6858-5p | 0.9939 | 0.9639                 |
| miR-6765-5p + miR-6789-5p | 0.9895 | 0.9663                 |
| miR-6877-5p + miR-4632-5p | 0.9901 | 0.9591                 |
| miR-187-5p + miR-1228-5p  | 0.9925 | 0.9663                 |
| miR-187-5p + -miR-1268b   | 0.9826 | 0.9519                 |
| miR-6877-5p + miR-1268b   | 0.9915 | 0.9567                 |
| miR-1343-3p + miR-6787-5p | 0.9852 | 0.9663                 |
| miR-1268b + miR-6836-3p   | 0.9864 | 0.9519                 |

**Supplementary Table3. Univariable and age-adjusted logistic regression analyses**

|                                           | univariable<br>OR (95% CI) | adjusted<br>OR (95% CI) |
|-------------------------------------------|----------------------------|-------------------------|
| Two-miRNA panel<br>(MiR-1268b + miR-6075) | 21.76 (15.98–29.63)        | 20.34 (13.99 - 29.57)   |
| miR-1268b                                 | 12.60 (10.60-14.97)        | 11.03 (9.00 - 13.52)    |
| miR-6075                                  | 7.10 (6.24-8.07)           | 7.48 (6.32 - 8.85)      |

Data are expressed as the odds ratio (95% confidence interval).

**Supplementary Table 4. Top 100 microRNAs in serum samples from NCCH and YMC (\* indicates three internal control microRNAs)**

| microRNAs       | NCCH | YMC  |
|-----------------|------|------|
| *hsa-miR-149-3p | 1    | 40   |
| hsa-miR-4763-3p | 2    | 63   |
| hsa-miR-6821-5p | 3    | 52   |
| hsa-miR-1268b   | 4    | 12   |
| hsa-miR-6756-5p | 5    | 64   |
| hsa-miR-4632-5p | 6    | 60   |
| hsa-miR-6858-5p | 7    | 65   |
| hsa-miR-4687-3p | 8    | 36   |
| hsa-miR-4689    | 9    | 77   |
| hsa-miR-4530    | 10   | 99   |
| hsa-miR-6879-5p | 11   | 93   |
| hsa-miR-6085    | 12   | 54   |
| hsa-miR-6791-5p | 13   | 51   |
| hsa-miR-4459    | 14   | >100 |
| hsa-miR-6802-5p | 15   | 61   |
| hsa-miR-937-5p  | 16   | 74   |
| hsa-miR-5001-5p | 17   | 87   |
| hsa-miR-4695-5p | 18   | 68   |
| hsa-miR-6785-5p | 19   | 97   |
| hsa-miR-1343-5p | 20   | 42   |
| hsa-miR-7108-5p | 21   | 47   |
| hsa-miR-6798-5p | 22   | 43   |
| hsa-miR-4442    | 23   | 66   |
| hsa-miR-3197    | 24   | 67   |
| hsa-miR-6781-5p | 25   | 13   |
| hsa-miR-6743-5p | 26   | 80   |
| hsa-miR-6765-5p | 27   | 25   |
| hsa-miR-6816-5p | 28   | 18   |
| hsa-miR-4758-5p | 29   | 55   |
| *hsa-miR-4463   | 30   | 45   |
| hsa-miR-1268a   | 31   | 11   |
| hsa-miR-6803-5p | 32   | 6    |

|                  |    |      |
|------------------|----|------|
| hsa-miR-4665-5p  | 33 | 82   |
| hsa-miR-4505     | 34 | 83   |
| hsa-miR-4294     | 35 | >100 |
| hsa-miR-4706     | 36 | 81   |
| hsa-miR-4723-5p  | 37 | 96   |
| hsa-miR-6757-5p  | 38 | >100 |
| hsa-miR-92b-5p   | 39 | 70   |
| hsa-miR-1227-5p  | 40 | 30   |
| hsa-miR-6768-5p  | 41 | 88   |
| hsa-miR-6724-5p  | 42 | 73   |
| hsa-miR-6845-5p  | 43 | 58   |
| hsa-miR-6780b-5p | 44 | 92   |
| hsa-miR-6752-5p  | 45 | 16   |
| hsa-miR-328-5p   | 46 | 34   |
| hsa-miR-4467     | 47 | 95   |
| hsa-miR-1228-5p  | 48 | 35   |
| hsa-miR-4739     | 49 | 57   |
| hsa-miR-6749-5p  | 50 | 49   |
| hsa-miR-3656     | 51 | 17   |
| hsa-miR-6726-5p  | 52 | >100 |
| hsa-miR-4651     | 53 | 33   |
| hsa-miR-6805-5p  | 54 | 32   |
| hsa-miR-6789-5p  | 55 | 41   |
| hsa-miR-4492     | 56 | 53   |
| hsa-miR-8072     | 57 | 39   |
| hsa-miR-6126     | 58 | 86   |
| hsa-miR-6125     | 59 | 8    |
| hsa-miR-1908-5p  | 60 | 27   |
| hsa-miR-6786-5p  | 61 | 2    |
| *hsa-miR-2861    | 62 | 19   |
| hsa-miR-6850-5p  | 63 | 20   |
| hsa-miR-1915-3p  | 64 | 84   |
| hsa-miR-3196     | 65 | 44   |
| hsa-miR-3940-5p  | 66 | 22   |
| hsa-miR-4484     | 67 | 75   |

|                  |     |      |
|------------------|-----|------|
| hsa-miR-1237-5p  | 68  | 46   |
| hsa-miR-4466     | 69  | 14   |
| hsa-miR-8069     | 70  | 9    |
| hsa-miR-6089     | 71  | 3    |
| hsa-miR-4508     | 72  | 15   |
| hsa-miR-4488     | 73  | 5    |
| hsa-miR-6784-5p  | 74  | 21   |
| hsa-miR-6090     | 75  | 1    |
| hsa-miR-4281     | 76  | 62   |
| hsa-miR-638      | 77  | 7    |
| hsa-miR-6729-5p  | 78  | 4    |
| hsa-miR-3178     | 79  | 31   |
| hsa-miR-3619-3p  | 80  | 98   |
| hsa-miR-1260b    | 81  | >100 |
| hsa-miR-663a     | 82  | 71   |
| hsa-miR-1469     | 83  | 59   |
| hsa-miR-642b-3p  | 84  | 94   |
| hsa-miR-6787-5p  | 85  | 56   |
| hsa-miR-7977     | 86  | >100 |
| hsa-miR-7975     | 87  | >100 |
| hsa-miR-5787     | 88  | 38   |
| hsa-miR-3621     | 89  | 50   |
| hsa-miR-3960     | 90  | 23   |
| hsa-miR-4787-5p  | 91  | 24   |
| hsa-miR-6087     | 92  | 69   |
| hsa-miR-6727-5p  | 93  | 28   |
| hsa-miR-1343-3p  | 94  | >100 |
| hsa-miR-4649-5p  | 95  | 85   |
| hsa-miR-6088     | 96  | 89   |
| hsa-miR-4258     | 97  | >100 |
| hsa-miR-762      | 98  | 37   |
| hsa-miR-128-2-5p | 99  | 91   |
| hsa-miR-7704     | 100 | 29   |

## Supplementary Methods

### Algorithm: combinatorial optimization for multicandidate miRNAs

Notation:

Nm: Number of miRNAs

mR(i): The ith miRNA where  $i = 1$  TO Nm

Ns: Number of miRNA sets with better performance to limit at each step.

Mc: Maximum number of miRNA combinations you want to examine.

Sc: Score (same as Accuracy) =  $(TP + TN) / (TP + FP + FN + TN)$ , where the meaning of

each variable is as follows:

|                     | cancer                        | no cancer                     |
|---------------------|-------------------------------|-------------------------------|
| prediction positive | TP: number of true positives  | FP: number of false positives |
| prediction negative | FN: number of false negatives | TN: number of true negatives  |

LDA-LOO(): Function of Linear Discriminant Algorithm (LDA) with Leave One Out Cross Validation (LOO-CV). We used LDA function included as `lda()` in R language MASS package version 7.3-45. The score (Sc) by LOO-CV is calculated as accumulated number, counting up the results (hit or not) of evaluating each leave-out sample, divided by number of trials.

Processing steps:

Step 1: Divide the data to be analyzed into halves for training data and test data.

Step 2: Set Ns=20 and Mc=10.

(For training data)

Step 3: Combinatorial optimization

FOR I = 1 TO Nm

Sc[i] = LDA-LOO( mR(i) )

```

miRNA_index_of_sorted[1:Nm] = ORDER( Sc[1:Nm], descend order )

Pivot[1:Ns] = miRNA_index_of_sorted[1:Ns] # get indexes of top Ns as Pivot

i = 1

FOR j = 1 TO Mc

    Sc = 0

    FOR k = 1 TO Nm

        IF k is not included in Pivot_set[j] {Sc[i] =

            LDA-LOO( mR[Pivot_set[j]], mR[k] )}

        i = i + 1

    miRNA_set[Ns * (Nm-i)] = ORDER( Sc[Ns * (Nm-i)], descend order )

    Pivot_set[1:Ns] = miRNA_set[1:Ns] # get indexes of top Ns as Pivot

```

Step 4: Calculate coefficients of Ns set of linear discriminant models.

Step 5: Calculate INDEX: An offset is added to the discrimination model so that the cutoff value becomes 0.

Step 6: Calculate performances for Ns discriminant models with sensitivity, specificity, accuracy, positive predictive value, negative predictive value, area under the ROC curve on the training data.

(For test data)

Step 7: calculate upper same performances using Ns discriminant models for test data.
